# Supplementary material for: Multivariate extension of penalized regression on summary statistics to construct polygenic risk scores for correlated traits
Source: PubMed Central journal article supplement (PMC10276147; doi:10.1016/j.xhgg.2023.100209), 2023-05-20
Supplement: mmc1.pdf [file mmc1.pdf]

**HGGA, Volume 4**

**Supplemental information**

**Multivariate extension of penalized regression  
on summary statistics to construct polygenic  
risk scores for correlated traits**

**Meriem Bahda, Jasmin Ricard, Simon L. Girard, Michel Maziade, Maripier  
Isabelle, and Alexandre Bureau**

# Supplemental information

## 1 Simulation parameters

For the mixture-of-four-genetic-covariance-matrices scenario, we generated the vector  $(\beta_{j1}, \beta_{j2})$  of genetic effects for the SNP  $j$  for the trait 1 and trait 2 as follows :

$$\begin{pmatrix} \beta_{j1} \\ \beta_{j2} \end{pmatrix} \sim \begin{cases} N \left( \begin{bmatrix} 0 \\ 0 \end{bmatrix}, \begin{bmatrix} \sigma^2 & \sigma^2 r \\ \sigma^2 r & \sigma^2 \end{bmatrix} \right) & \text{with probability } \pi_1 \quad (C = 1) \\ \begin{bmatrix} N(0, \sigma^2) \\ 0 \\ 0 \\ N(0, \sigma^2) \end{bmatrix} & \text{with probability } \pi_2 \quad (C = 2) \\ \begin{bmatrix} 0 \\ 0 \end{bmatrix} & \text{with probability } \pi_3 \quad (C = 3) \\ \begin{bmatrix} 0 \\ 0 \end{bmatrix} & \text{with probability } \pi_4 \quad (C = 4) \end{cases} \quad (1)$$

with

$$\begin{aligned} & \cdot \text{Cov}(\beta_{j1}, \beta_{j2}) = \text{Cov}(\beta_{j1}, \beta_{j2} \mid C = 1) \cdot P(C = 1) = \sigma^2 r \pi_1, \\ & \cdot \text{Var}(\beta_{j1}) = \text{Var}(\beta_{j1} \mid C \leq 2) \cdot P(C \leq 2) = \sigma^2 (\pi_1 + \pi_2), \\ & \cdot \text{Var}(\beta_{j2}) = \text{Var}(\beta_{j2} \mid C \in \{1, 3\}) \cdot P(C \in \{1, 3\}) = \sigma^2 (\pi_1 + \pi_3), \\ & \cdot \pi_1 + \pi_2 + \pi_3 + \pi_4 = 1. \end{aligned} \quad (2)$$

We have 6 unknown parameters,  $\pi_1, \pi_2, \pi_3, \pi_4, \sigma, r$ , and 4 equations. We chose to specify the value of the parameters  $\pi_1$  and  $\sigma$  in order to solve the equations.

It is important to note that we have the following constraints when we choose the value of  $\pi_1$  :

$$\begin{aligned} \pi_1 &> \frac{\text{Cov}(\beta_{j1}, \beta_{j2})}{\sigma^2}, \\ \pi_1 &< \min \left( \frac{\text{Var}(\beta_{j1})}{\sigma^2}, \frac{\text{Var}(\beta_{j2})}{\sigma^2} \right). \end{aligned}$$

Otherwise, we obtain negative values for the parameters  $\pi_2$  and  $\pi_3$ , and a value of  $r$  greater than 1. We note that under the constant heritability and genetic covariance scenario,  $\text{Cov}(\beta_{j1}, \beta_{j2}) = \frac{1}{p} \rho_g$  and  $\text{Var}(\beta_{jk}) = \frac{1}{p} h_{gk}^2, k = 1, 2$ , i.e. they are proportional to the prespecified heritabilities and genetic covariance.

The value of  $\sigma^2$  was chosen according to the number of SNPs used in the simulations, in order to obtain targeted ranges of values for  $\pi_1$ . For the high polygenicity scenario, we set  $\sigma^2 = 2.00e - 6$  with 479,158 SNPs and  $\sigma^2 = 2.26e - 6$  with 423,552 SNPs in order to have a  $\pi_1$  that varies within the interval  $[0.29 ; 0.45]$ . We then set  $\pi_1 = 0.35$  and obtained  $\pi_2 = 0.15, \pi_3 = 0.13, \pi_4 = 0.37$  and  $r = 0.79$  by solving the system of equations (2). For the low polygenicity scenario, we set  $\sigma^2 = 1.06e - 5$  and  $\pi_1 = 0.08$  and obtained  $\pi_2 = 0.024, \pi_3 = 0.02, \pi_4 = 0.876$  and  $r = 0.88$  by solving the system of equations (2). Table S1 presents the corresponding number of SNPs for each scenario.

For the scenario where the heritabilities and genetic covariance of the two traits depend on predictions from BLD-X model annotations we kept the same  $\pi_s$ . Given the predicted contribution to heritability of either trait was negative for a number of SNPs and was thus set to 0 to begin with, the selection of causal SNPs for the simulation was restricted. We present below the steps for the simulations with 423,552 SNPs and high polygenicity. Similar steps were followed for 479,158 SNPs or low polygenicity.

1. The 148,243 SNPs causal for both traits (35% of 423,552) were selected among the 282,194 SNPs with  $\hat{h}_{g_1}^2(j) > 0$  and  $\hat{h}_{g_2}^2(j) > 0$ .
2. The 59,445 SNPs causal for trait 1 only were selected among the SNPs remaining from step 1 and the 37,293 SNPs with  $\hat{h}_{g_1}^2(j) > 0$  and  $\hat{h}_{g_2}^2(j) \leq 0$ .
3. The 50,607 SNPs causal for trait 2 only were selected among the SNPs remaining from step 1 not selected at step 2 and the 45,184 SNPs with  $\hat{h}_{g_1}^2(j) \leq 0$  and  $\hat{h}_{g_2}^2(j) > 0$ .
4. The effect of all remaining SNPs was set to 0.

The non-zero SNP effects were then simulated according to equation (7) from the main text.

## 2 Genotyping quality control procedures

SNPs with the following quality problems were removed: missing call rate higher than 0.02, SNP mismatches with Haplotype reference consortium (HRC), SNPs which are indels, minor allele frequency difference with HRC  $> 0.2$ , palindromic SNP with frequency  $> 0.4$ , allele mismatch with HRC, duplicates, Hardy Weinberg equilibrium test p-value lower than  $10^{-7}$ . From the first wave of SNP array genotyping using an Illumina Omni Express chips at Genome Québec, a total of 507 subjects were genotyped at 656,032 autosomal SNPs. A total of 33,848 SNPs were removed following quality control. Imputation using the Michigan Imputation Server resulted in a total of 39,127,678 imputed SNPs.

From the second wave of SNP array genotyping using an Illumina Global Screening Array at Genome Québec, a total of 615 subjects were genotyped at 691,719 autosomal SNPs. Two subjects were removed: one, thought to be a brother of three other subjects, turned out to be a half-brother after analysis with Prest-plus software and the other presented a sex discordance along with a high rate of Mendelian errors. A total of 188,854 SNPs were removed following quality control. Imputation using the Michigan Imputation Server resulted in a total of 39,131,578 imputed SNPs.

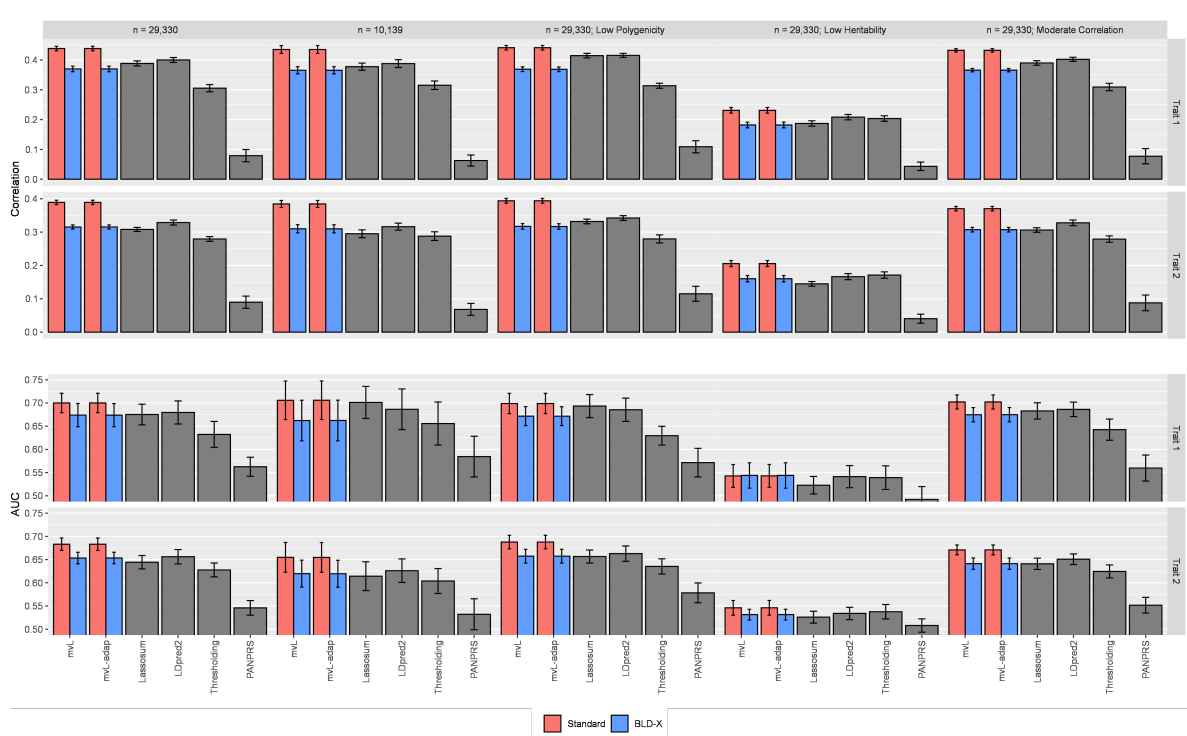

Figure S1: Comparison of PRS predictive performance for multiple variations of the simulation scenario with a mixture of four constant genetic covariance matrices. Top panel: Pearson correlation of the PRS with the true predictor. Bottom panel: area under the receiver operating curve (AUC) for the prediction of simulated traits by PRS. Mean and 95% confidence interval based on 20 replicates. The penalty parameter  $\lambda$  (for the penalized regression methods) and the threshold for thresholding were set to the values maximizing the correlation between the PRS and the trait  $y$  in a validation set. Models for heritability and covariance used in analysis : BLD-X: Baseline linkage disequilibrium model-cross trait; Standard: constant contribution of standardized genotypes of all SNPs.

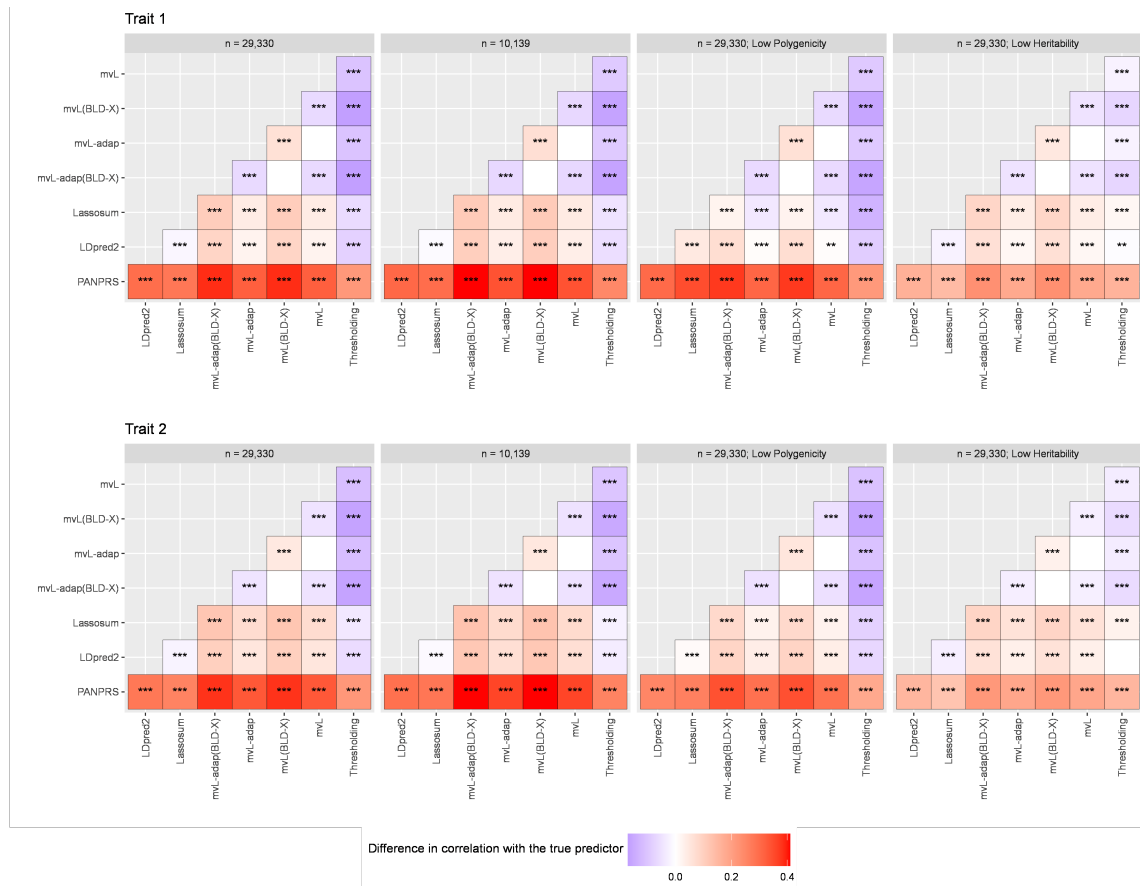

Figure S2: Difference in Pearson correlation of the PRS with the true predictor between methods under various simulation scenarios with heritability and genetic covariance of the two traits depending on genomic annotations. See legend of Figure 1 for the definitions of acronyms for the methods. Statistical significance of the difference evaluated by paired t-tests using 20 replicates, and p-values were corrected for multiple testing using the Bonferroni method. \*:  $p < 0.05$ , \*\*:  $p < 5 \times 10^{-4}$ , \*\*\*:  $p < 5 \times 10^{-8}$

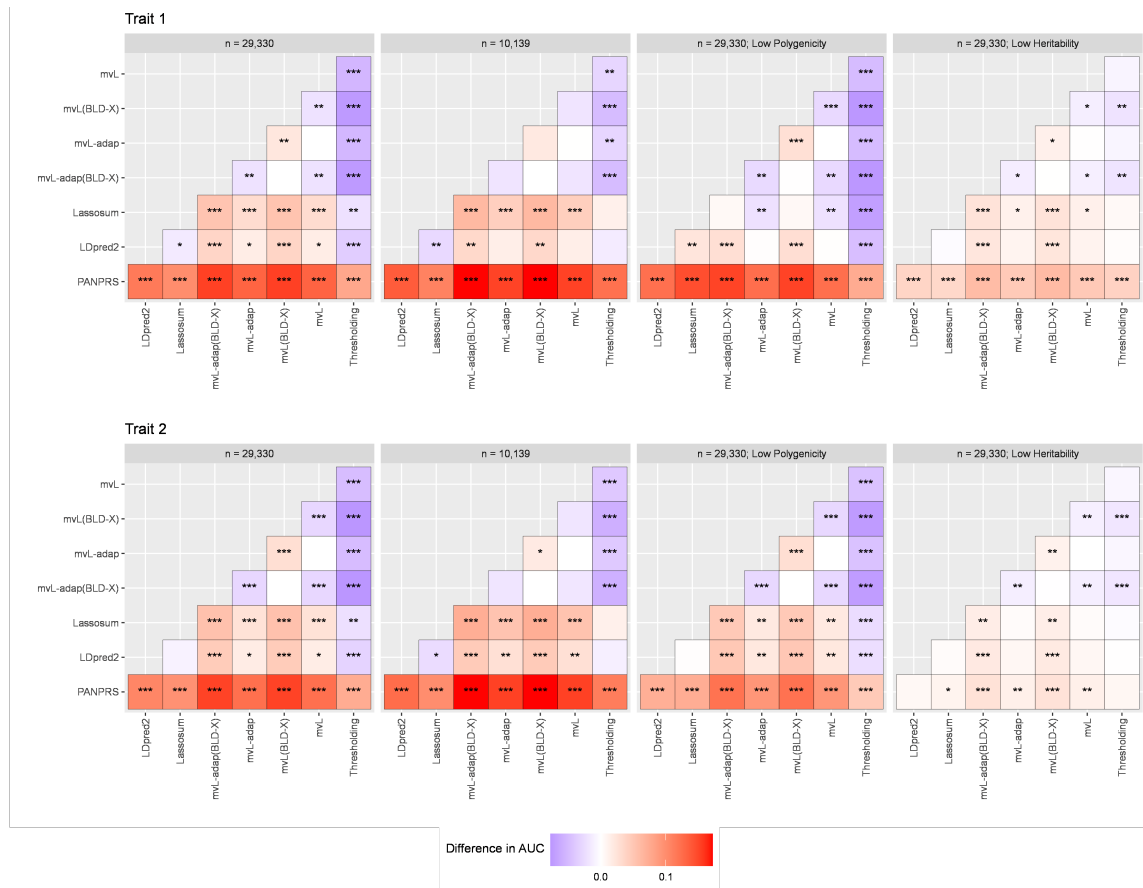

Figure S3: Difference in area under the receiver operating curve (AUC) for the prediction of simulated traits by PRS under various simulation scenarios with heritability and genetic covariance of the two traits depending on genomic annotations. See legend of Figure 1 for the definitions of acronyms for the methods. Statistical significance of the difference evaluated by paired t-tests using 20 replicates, and p-values were corrected for multiple testing using the Bonferroni method. \*:  $p < 0.05$ , \*\*:  $p < 5 \times 10^{-4}$ , \*\*\*:  $p < 5 \times 10^{-8}$

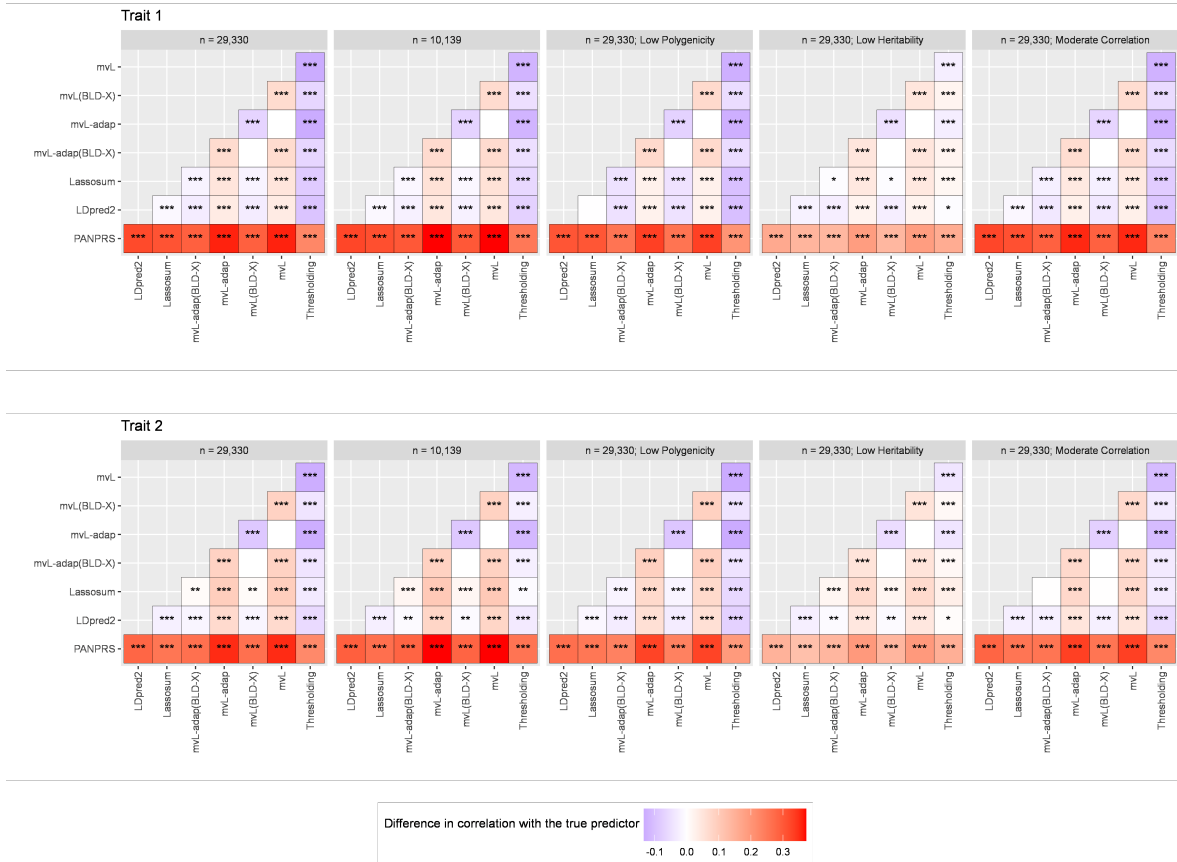

Figure S4: Difference in Pearson correlation of the PRS with the true predictor between methods under various simulation scenarios with a mixture of four constant genetic covariance matrices. See legend of Figure 1 for the definitions of acronyms for the methods. Statistical significance of the difference evaluated by paired t-tests using 20 replicates, and p-values were corrected for multiple testing using the Bonferroni method. \*:  $p < 0.05$ , \*\*:  $p < 5 \times 10^{-4}$ , \*\*\*:  $p < 5 \times 10^{-8}$

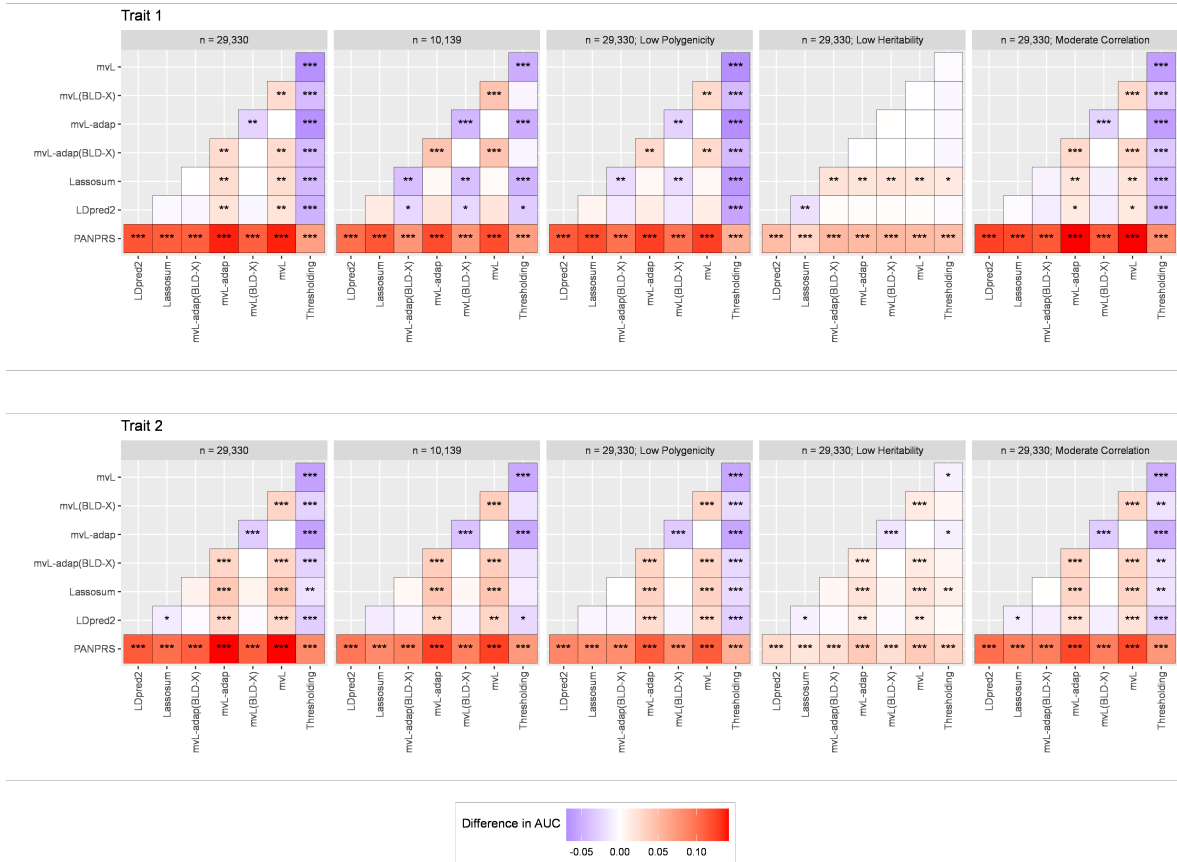

Figure S5: Difference in area under the receiver operating curve (AUC) for the prediction of simulated traits by PRS under various simulation scenarios with a mixture of four constant genetic covariance matrices. See legend of Figure 1 for the definitions of acronyms for the methods. Statistical significance of the difference evaluated by paired t-tests using 20 replicates, and p-values were corrected for multiple testing using the Bonferroni method. \*:  $p < 0.05$ , \*\*:  $p < 5 \times 10^{-4}$ , \*\*\*:  $p < 5 \times 10^{-8}$



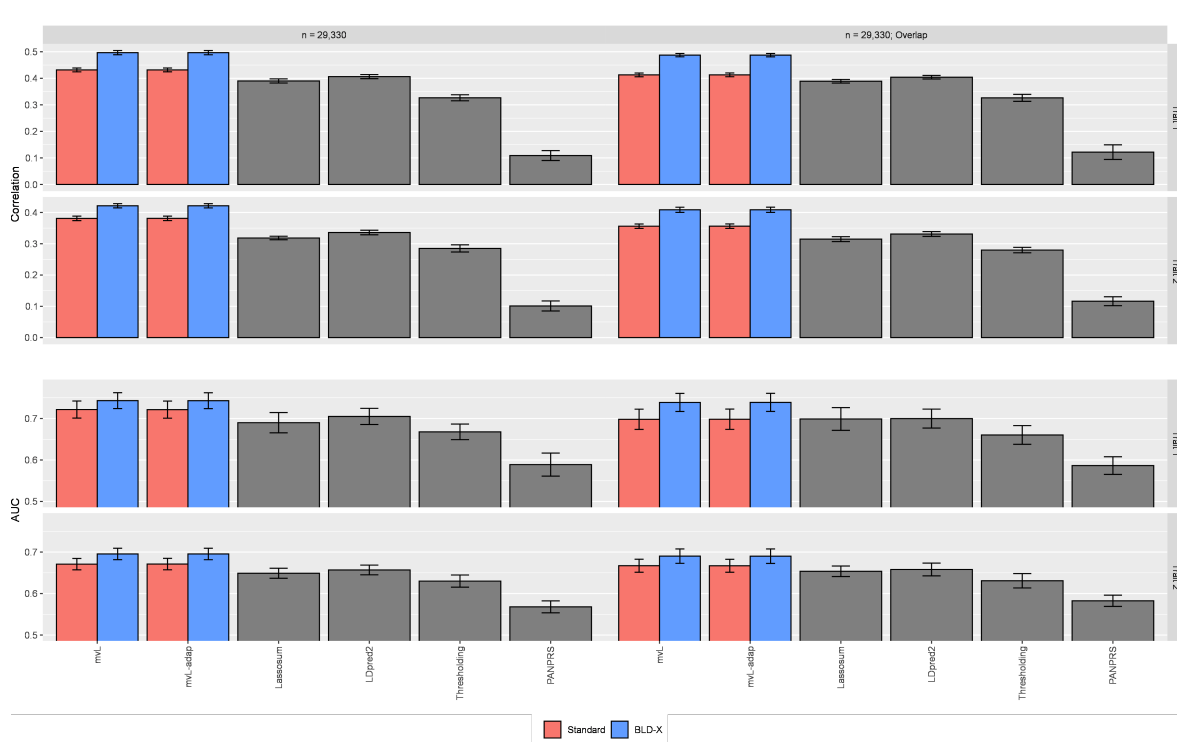

Figure S6: Comparison of PRS predictive performance in presence of simulated sample overlap with between-trait summary-statistics correlation  $\hat{\rho}_o = 0.32$  compared to independent samples under the simulation scenario where heritability and genetic covariance of two traits depend on genomic annotations. Top panel: Pearson correlation of the PRS with the true predictor. Bottom panel: area under the receiver operating curve (AUC) for the prediction of simulated traits by PRS. Mean and 95% confidence interval based on 20 replicates. The penalty parameter  $\lambda$  (for the penalized regression methods) and the threshold for thresholding were set to the values maximizing the correlation between the PRS and the trait  $y$  in a validation set. Methods compared: mvL: Multivariate Lassosum with constant penalty, mvL-adapt: Multivariate Lassosum with adaptive penalty based on the initial estimates from mvL. Models for heritability and covariance used in analysis : BLD-X: Baseline linkage disequilibrium model-cross trait; Standard: constant contribution of standardized genotypes of all SNPs.

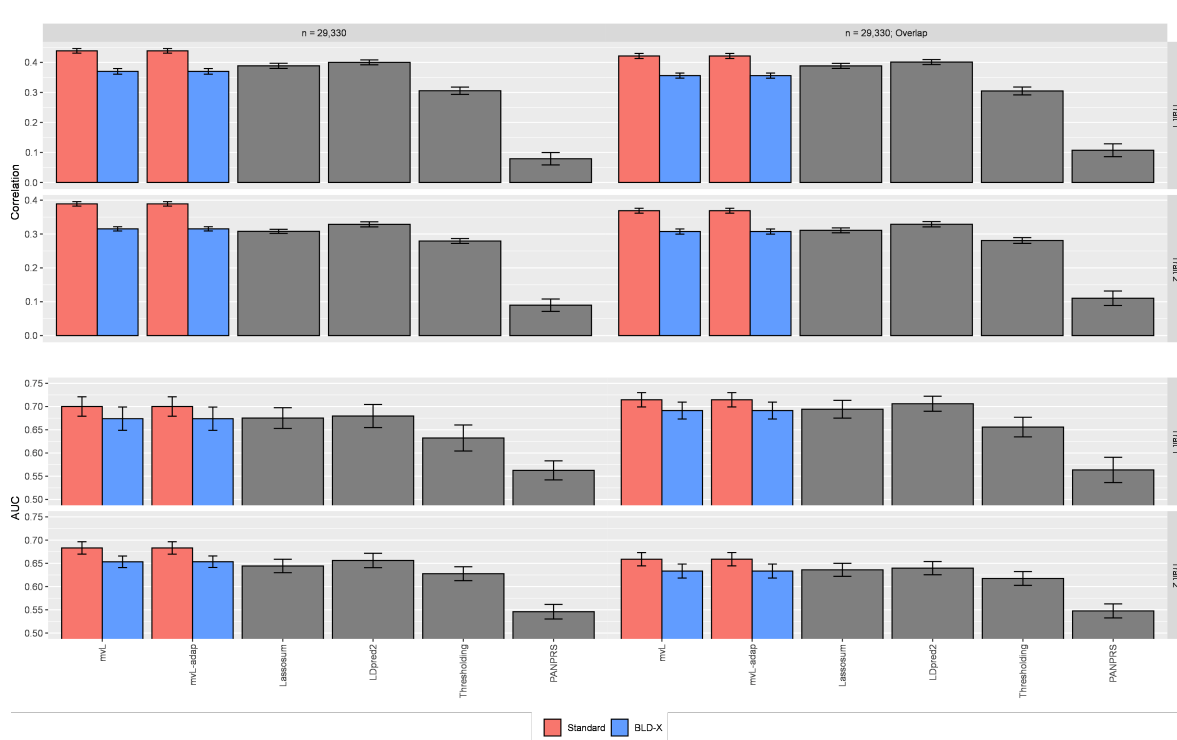

Figure S7: Comparison of PRS predictive performance in presence of simulated sample overlap with between-trait summary-statistics correlation  $\hat{\rho}_o = 0.32$  compared to independent samples under the simulation scenario with a mixture of four constant genetic covariance matrices. Top panel: Pearson correlation of the PRS with the true predictor. Bottom panel: area under the receiver operating curve (AUC) for the prediction of simulated traits by PRS. Mean and 95% confidence interval based on 20 replicates. The penalty parameter  $\lambda$  (for the penalized regression methods) and the threshold for thresholding were set to the values maximizing the correlation between the PRS and the trait  $y$  in a validation set. Methods compared: mvL: Multivariate LassoSum with constant penalty, mvL-adapt: Multivariate LassoSum with adaptive penalty based on the initial estimates from mvL. Models for heritability and covariance used in analysis : BLD-X: Baseline linkage disequilibrium model-cross trait; Standard: constant contribution of standardized genotypes of all SNPs.

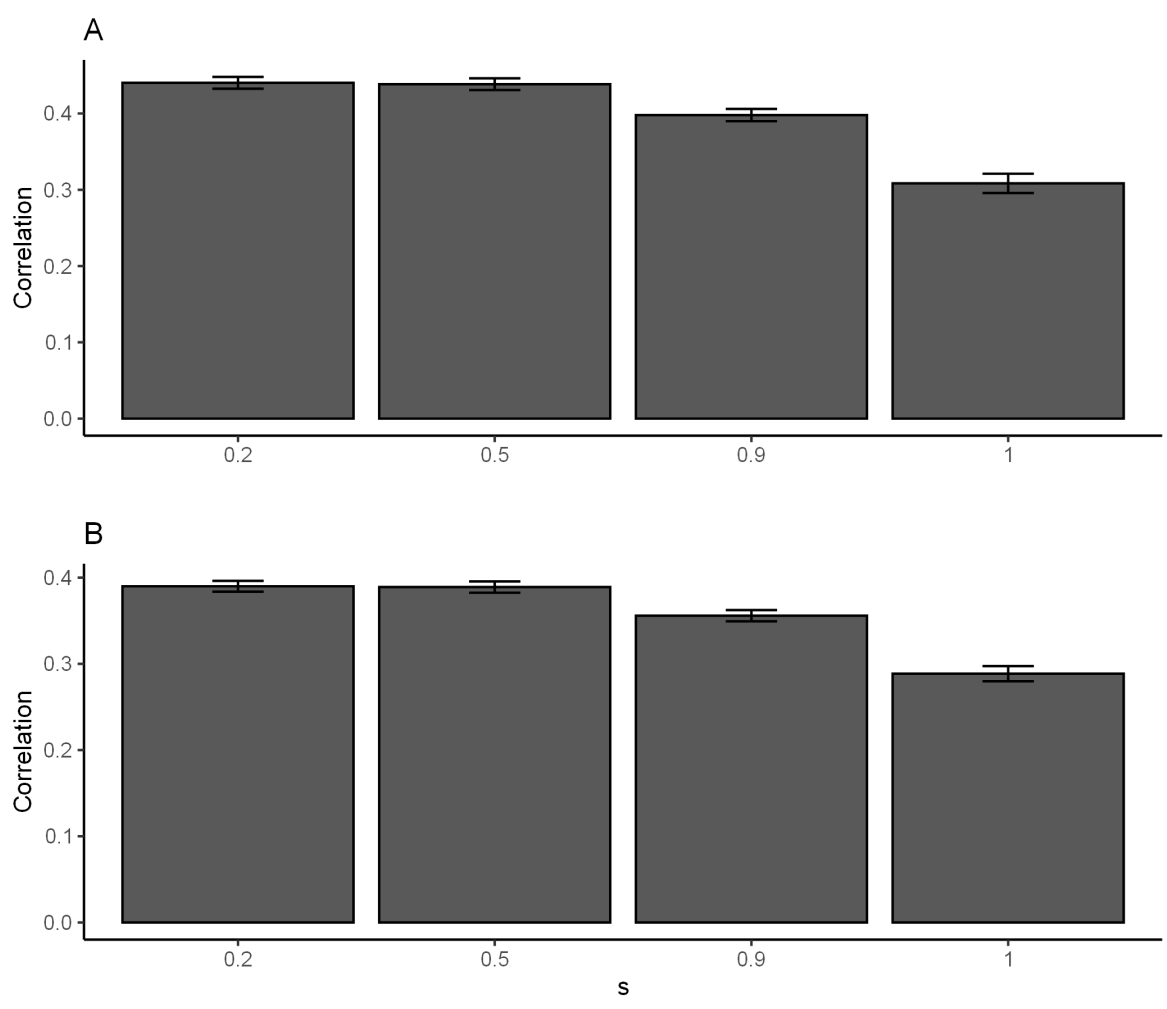

Figure S8: Pearson correlation of the PRS with the true predictor as a function of the  $s$  regularization parameter under the reference simulation scenario. A) Heritability and genetic covariance of two traits depending on genomic annotations B) Mixture of four constant genetic covariance matrices.

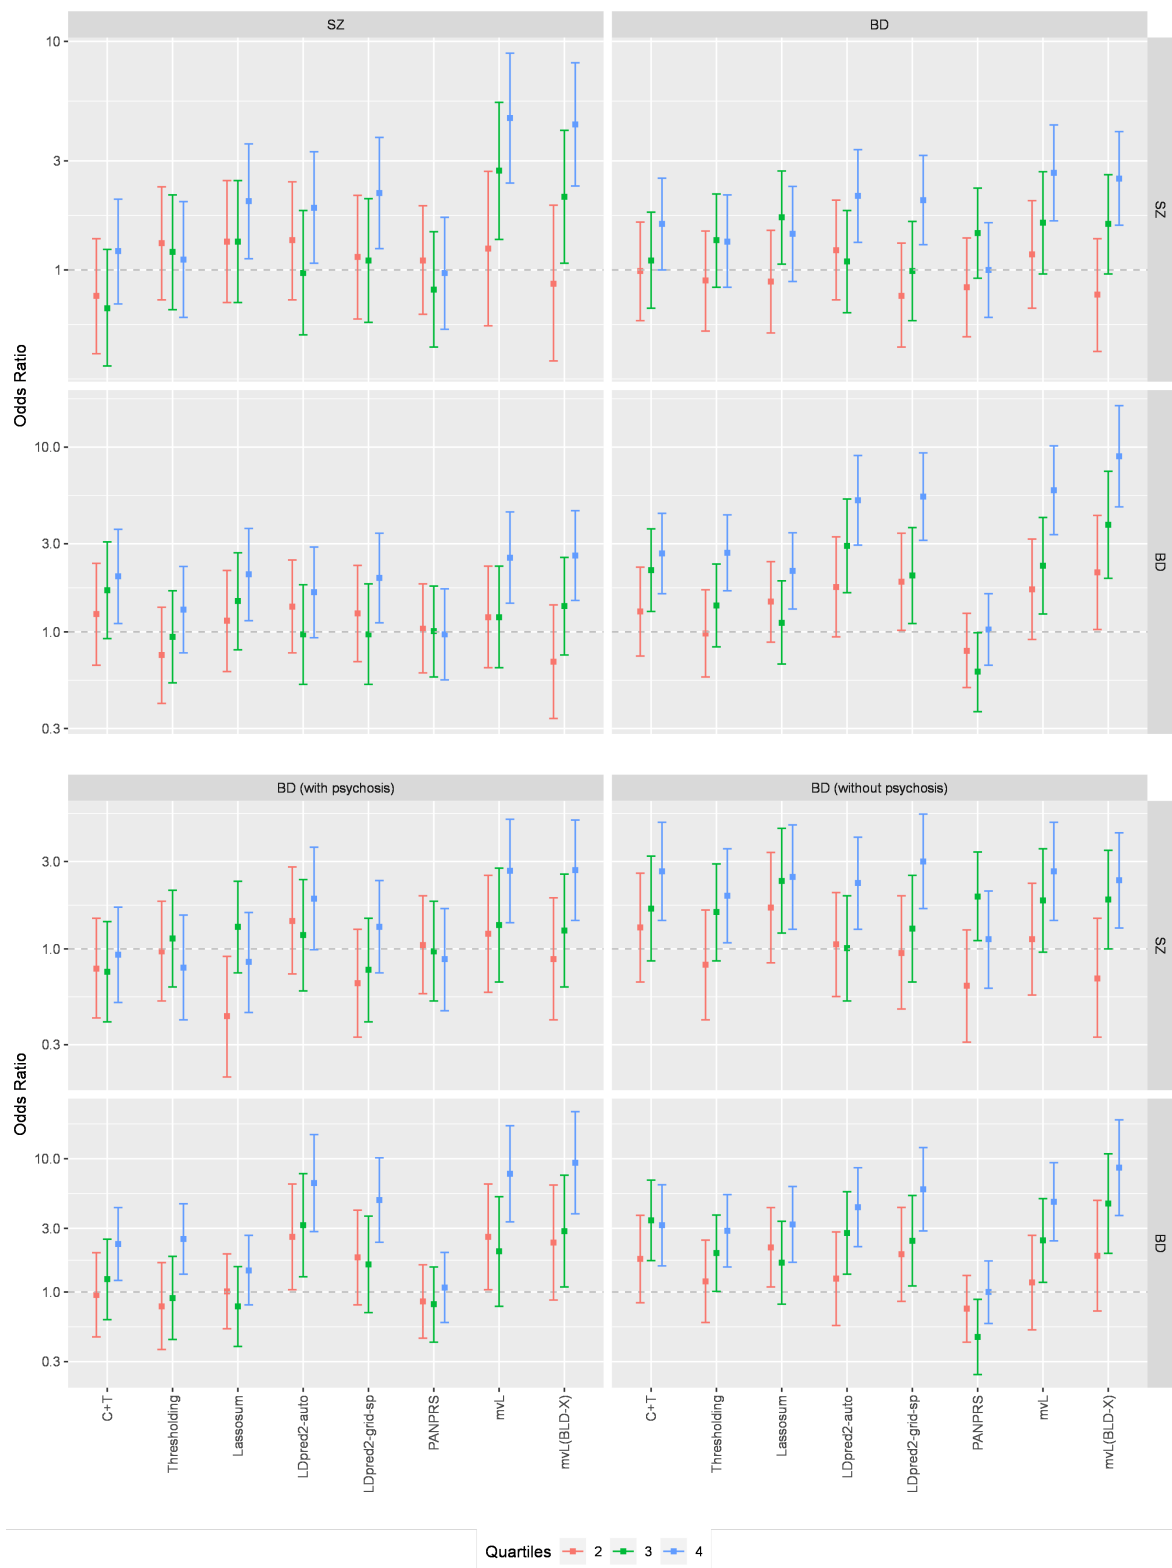

Figure S9: Odds ratios of psychiatric diagnoses for the second to fourth quartiles of PRS defined in the non-affected adult relatives compared to the first quartile based on various PRS definitions. Estimates and 95% confidence intervals. Each column is a predicted trait and each row a trait on which summary statistics were obtained to construct PRSs. SZ : schizophrenia, BD: Bipolar disorder. Schizoaffective disorder was excluded due to the small number of cases.

Table S1: Number of causal SNPs for each trait combination under different numbers of SNPs and polygenicity levels

| Traits  | $\pi^a$ | High Polygenicity         |                           | Low Polygenicity |                           |
|---------|---------|---------------------------|---------------------------|------------------|---------------------------|
|         |         | n = 10,139<br>p = 479,158 | n = 29,330<br>p = 423,552 | $\pi^a$          | n = 29,330<br>p = 423,552 |
| 1 and 2 | 0.35    | 167,705                   | 148,243                   | 0.080            | 33,884                    |
| 1       | 0.14    | 67,082                    | 59,445                    | 0.024            | 10,353                    |
| 2       | 0.12    | 57,499                    | 50,607                    | 0.020            | 8,471                     |
| None    | 0.39    | 186,872                   | 165,257                   | 0.876            | 370,844                   |

<sup>a</sup>: Proportion of causal SNPs in each case

Table S2: Features of the polygenic risk score methods

| Method             | Parameters                                                                | Use of validation<br>sample | Heritability<br>model          | Clumping<br>(in real data) |
|--------------------|---------------------------------------------------------------------------|-----------------------------|--------------------------------|----------------------------|
| C + T <sup>a</sup> | P-value threshold,<br>Correlation threshold                               | Yes                         | NA                             | Yes                        |
| Thresholding       | P-value threshold                                                         | Yes                         | NA                             | No                         |
| Lassosum           | $\lambda$ : LASSO penalty,<br>$s$ : $R$ regularization                    | Yes                         | Equal                          | No                         |
| LDpred2-auto       | $p$ : Proportion of causal variants,<br>$h^2$ : Heritability              | No                          | Equal                          | No                         |
| LDpred2-grid-sp    | $p$ : Proportion of causal variants<br>$h^2$ : Heritability               | Yes                         | Equal                          | No                         |
| PANPRS             | $\lambda_0$ : LASSO penalty,<br>$\lambda_1$ : Traits total effect penalty | Yes                         | Equal                          | Yes                        |
| mvL <sup>b</sup>   | $\lambda$ : LASSO penalty,<br>$s$ : $R$ regularization                    | Yes                         | Equal or<br>BLD-X <sup>c</sup> | No                         |

<sup>a</sup>: Clumping and thresholding

<sup>b</sup>: Multivariate Lassosum

<sup>c</sup>: Baseline linkage disequilibrium model-cross trait

Table S3: Predictive performance of PRSs on psychiatric traits in the Eastern Quebec schizophrenia and bipolar disorder study

| SS <sup>a</sup> | Trait            | n                                       | Method                   | OR (95% CI) <sup>b</sup>   | P-value               | R <sup>2c</sup>      | R <sup>2c</sup> <sub>liab.</sub> | AUC   |       |       |
|-----------------|------------------|-----------------------------------------|--------------------------|----------------------------|-----------------------|----------------------|----------------------------------|-------|-------|-------|
| SZ <sup>h</sup> | SZ               | Cases = 124<br>NAARs <sup>d</sup> = 442 | C+T <sup>e</sup>         | 1.04 (0.85-1.28)           | 0.679                 | 3 × 10 <sup>-4</sup> | 3 × 10 <sup>-4</sup>             | 0.516 |       |       |
|                 |                  |                                         | Thresholding             | 1.01 (0.83-1.22)           | 0.960                 | 0.000                | 0.000                            | 0.497 |       |       |
|                 |                  |                                         | Lassosum                 | 1.19 (0.95-1.49)           | 0.126                 | 0.006                | 0.004                            | 0.563 |       |       |
|                 |                  |                                         | LDpred2-auto             | 1.35 (1.10-1.67)           | 0.005                 | 0.018                | 0.012                            | 0.573 |       |       |
|                 |                  |                                         | LDpred2-grid-sp          | 1.43 (1.14-1.80)           | 0.002                 | 0.025                | 0.016                            | 0.595 |       |       |
|                 |                  |                                         | PANPRS                   | 0.95 (0.77-1.17)           | 0.649                 | 5 × 10 <sup>-4</sup> | 3 × 10 <sup>-4</sup>             | 0.486 |       |       |
|                 |                  |                                         | mvL <sup>f</sup>         | 1.90 (1.52-2.38)           | 2 × 10 <sup>-8</sup>  | 0.079                | 0.051                            | 0.685 |       |       |
|                 |                  |                                         | mvL(BLD-X <sup>g</sup> ) | 1.85 (1.46-2.34)           | 3 × 10 <sup>-7</sup>  | 0.074                | 0.047                            | 0.682 |       |       |
|                 |                  |                                         | BD                       | Cases = 205<br>NAARs = 442 | C+T                   | 1.21 (1.01-1.44)     | 0.041                            | 0.008 | 0.005 | 0.558 |
|                 |                  |                                         |                          |                            | Thresholding          | 1.21 (1.02-1.43)     | 0.025                            | 0.008 | 0.006 | 0.546 |
|                 | Lassosum         | 1.11 (0.93-1.32)                        |                          |                            | 0.261                 | 0.003                | 0.002                            | 0.549 |       |       |
|                 | LDpred2-auto     | 1.39 (1.17-1.65)                        |                          |                            | 2 × 10 <sup>-4</sup>  | 0.023                | 0.016                            | 0.590 |       |       |
|                 | LDpred2-grid-sp  | 1.36 (1.13-1.63)                        |                          |                            | 9 × 10 <sup>-4</sup>  | 0.022                | 0.015                            | 0.596 |       |       |
|                 | PANPRS           | 1.08 (0.91-1.27)                        |                          |                            | 0.381                 | 0.001                | 9 × 10 <sup>-4</sup>             | 0.522 |       |       |
|                 | mvL              | 1.44 (1.20-1.73)                        |                          |                            | 7 × 10 <sup>-5</sup>  | 0.032                | 0.021                            | 0.618 |       |       |
|                 | mvL(BLD-X)       | 1.48 (1.24-1.77)                        |                          |                            | 2 × 10 <sup>-5</sup>  | 0.035                | 0.024                            | 0.620 |       |       |
|                 | SAD              | Cases = 35<br>NAARs = 442               |                          |                            | C+T                   | 1.83 (1.21-2.79)     | 0.005                            | 0.019 | 0.025 | 0.626 |
|                 |                  |                                         |                          |                            | Thresholding          | 1.66 (1.16-2.38)     | 0.006                            | 0.015 | 0.023 | 0.633 |
|                 |                  |                                         | Lassosum                 | 1.58 (1.12-2.21)           | 0.008                 | 0.009                | 0.016                            | 0.616 |       |       |
|                 |                  |                                         | LDpred2-auto             | 1.59 (1.08-2.34)           | 0.019                 | 0.019                | 0.021                            | 0.604 |       |       |
| LDpred2-grid-sp |                  |                                         | 1.74 (1.16-2.62)         | 0.007                      | 0.026                 | 0.028                | 0.622                            |       |       |       |
| PANPRS          |                  |                                         | 1.19 (0.82-1.72)         | 0.353                      | 0.002                 | 0.003                | 0.573                            |       |       |       |
| mvL             |                  |                                         | 1.60 (1.12-2.29)         | 0.011                      | 0.025                 | 0.026                | 0.609                            |       |       |       |
| mvL(BLD-X)      |                  |                                         | 1.49 (0.99-2.22)         | 0.054                      | 0.025                 | 0.019                | 0.591                            |       |       |       |
| BD              |                  |                                         | SZ                       | Cases = 124<br>NAARs = 442 | C+T                   | 1.27 (1.03-1.56)     | 0.023                            | 0.009 | 0.008 | 0.573 |
|                 |                  |                                         |                          |                            | Thresholding          | 1.18 (0.97-1.45)     | 0.104                            | 0.005 | 0.004 | 0.547 |
|                 | Lassosum         | 1.25 (1.00-1.55)                        |                          |                            | 0.046                 | 0.008                | 0.006                            | 0.578 |       |       |
|                 | LDpred2-auto     | 1.17 (0.96-1.44)                        |                          |                            | 0.118                 | 0.005                | 0.004                            | 0.539 |       |       |
|                 | LDpred2-grid-sp  | 1.27 (1.03-1.56)                        |                          |                            | 0.024                 | 0.011                | 0.008                            | 0.568 |       |       |
|                 | PANPRS           | 0.98 (0.80-1.19)                        |                          |                            | 0.824                 | 8 × 10 <sup>-5</sup> | 7 × 10 <sup>-5</sup>             | 0.497 |       |       |
|                 | mvL              | 1.47 (1.19-1.81)                        |                          |                            | 3 × 10 <sup>-4</sup>  | 0.030                | 0.021                            | 0.611 |       |       |
|                 | mvL(BLD-X)       | 1.58 (1.27-1.96)                        |                          |                            | 3 × 10 <sup>-5</sup>  | 0.041                | 0.028                            | 0.631 |       |       |
|                 | BD               | Cases = 205<br>NAARs = 442              |                          |                            | C+T                   | 1.49 (1.25-1.78)     | 7 × 10 <sup>-6</sup>             | 0.032 | 0.023 | 0.614 |
|                 |                  |                                         |                          |                            | Thresholding          | 1.59 (1.33-1.90)     | 2 × 10 <sup>-7</sup>             | 0.044 | 0.031 | 0.623 |
|                 |                  |                                         | Lassosum                 | 1.21 (1.01-1.43)           | 0.034                 | 0.007                | 0.005                            | 0.563 |       |       |
|                 |                  |                                         | LDpred2-auto             | 1.95 (1.63-2.33)           | 5 × 10 <sup>-13</sup> | 0.094                | 0.060                            | 0.682 |       |       |
|                 |                  |                                         | LDpred2-grid-sp          | 2.02 (1.68-2.42)           | 8 × 10 <sup>-14</sup> | 0.097                | 0.062                            | 0.686 |       |       |
|                 |                  |                                         | PANPRS                   | 0.98 (0.83-1.16)           | 0.837                 | 7 × 10 <sup>-5</sup> | 5 × 10 <sup>-5</sup>             | 0.491 |       |       |
|                 |                  |                                         | mvL                      | 2.06 (1.72-2.47)           | 7 × 10 <sup>-15</sup> | 0.106                | 0.068                            | 0.695 |       |       |
|                 |                  |                                         | mvL(BLD-X)               | 2.19 (1.82-2.63)           | 1 × 10 <sup>-16</sup> | 0.123                | 0.077                            | 0.713 |       |       |
|                 |                  |                                         | SAD                      | Cases = 35<br>NAARs = 442  | C+T                   | 1.65 (1.16-2.34)     | 0.005                            | 0.017 | 0.025 | 0.633 |
|                 |                  |                                         |                          |                            | Thresholding          | 1.54 (1.09-2.15)     | 0.013                            | 0.010 | 0.018 | 0.643 |
|                 | Lassosum         | 1.60 (1.09-2.35)                        |                          |                            | 0.015                 | 0.014                | 0.021                            | 0.645 |       |       |
|                 | LDpred2-auto     | 1.81 (1.29-2.53)                        |                          |                            | 6 × 10 <sup>-4</sup>  | 0.025                | 0.036                            | 0.665 |       |       |
| LDpred2-grid-sp | 2.21 (1.54-3.17) | 2 × 10 <sup>-5</sup>                    |                          |                            | 0.049                 | 0.061                | 0.711                            |       |       |       |
| PANPRS          | 0.74 (0.53-1.04) | 0.086                                   |                          |                            | 0.005                 | 0.009                | 0.414                            |       |       |       |
| mvL             | 2.62 (1.83-3.74) | 1 × 10 <sup>-7</sup>                    |                          |                            | 0.080                 | 0.092                | 0.759                            |       |       |       |
| mvL(BLD-X)      | 2.51 (1.78-3.53) | 1 × 10 <sup>-7</sup>                    |                          |                            | 0.076                 | 0.088                | 0.741                            |       |       |       |

- a*: SS: summary statistics
- b*: Odds ratio of trait and 95% confidence interval for an increase of 1 standard deviation in PRS
- c*: Squared Pearson correlation ( $R^2$ ) and coefficient of determination on the liability scale ( $R^2_{\text{liab.}}$ )<sup>1</sup> of PRS and diagnosis status. Population prevalence was set to 1% for SZ, 2% for BD and 0.3% for SAD<sup>2</sup>
- d*: Non-affected adult relatives
- e*: Clumping (window size=250 kb,  $r^2$  and p selected by validation) and thresholding (p selected by validation)
- f*: Multivariate Lasso
- g*: BLD-X: Baseline linkage disequilibrium model-cross trait
- h*: SZ: schizophrenia, BD: bipolar disorder, SAD: schizoaffective disorder

Table S4: Predictive performance of PRS on bipolar disorder with and without psychosis in the Eastern Quebec schizophrenia and bipolar disorder study

| $SS^a$                    | Trait                      | n                                      | Method           | OR (95% CI) <sup>b</sup> | P-value             | $R^{2c}$           | $R_{liab}^{2c}$    | AUC   |
|---------------------------|----------------------------|----------------------------------------|------------------|--------------------------|---------------------|--------------------|--------------------|-------|
| SZ <sup>h</sup>           | BD<br>(with psychosis)     | Cases = 93<br>NAARs <sup>d</sup> = 442 | C+T <sup>e</sup> | 0.92 (0.74-1.15)         | 0.473               | 0.001              | 0.001              | 0.489 |
|                           |                            |                                        | Thresholding     | 0.99 (0.80-1.23)         | 0.959               | 0.000              | 0.000              | 0.489 |
|                           |                            |                                        | Lassosum         | 0.88 (0.71-1.10)         | 0.266               | 0.003              | 0.002              | 0.496 |
|                           |                            |                                        | LDpred2-auto     | 1.31 (1.04-1.64)         | 0.022               | 0.009              | 0.009              | 0.569 |
|                           |                            |                                        | LDpred2-grid-sp  | 1.15 (0.90-1.46)         | 0.259               | 0.003              | 0.003              | 0.545 |
|                           |                            |                                        | PANPRS           | 0.96 (0.76-1.20)         | 0.695               | $3 \times 10^{-4}$ | $3 \times 10^{-4}$ | 0.487 |
|                           |                            |                                        | mvL <sup>f</sup> | 1.40 (1.09-1.78)         | 0.008               | 0.020              | 0.015              | 0.609 |
|                           | mvL(BLD-X <sup>g</sup> )   | 1.45 (1.13-1.87)                       | 0.004            | 0.026                    | 0.019               | 0.618              |                    |       |
|                           | BD<br>(without psychosis)  | Cases = 112<br>NAARs = 442             | C+T              | 1.62 (1.24-2.1)          | $4 \times 10^{-4}$  | 0.033              | 0.023              | 0.615 |
|                           |                            |                                        | Thresholding     | 1.42 (1.14-1.78)         | 0.002               | 0.023              | 0.017              | 0.593 |
|                           |                            |                                        | Lassosum         | 1.40 (1.10-1.78)         | 0.009               | 0.017              | 0.013              | 0.593 |
|                           |                            |                                        | LDpred2-auto     | 1.47 (1.17-1.85)         | 0.001               | 0.026              | 0.019              | 0.607 |
|                           |                            |                                        | LDpred2-grid-sp  | 1.62 (1.26-2.09)         | $2 \times 10^{-4}$  | 0.038              | 0.027              | 0.639 |
|                           |                            |                                        | PANPRS           | 1.19 (0.97-1.46)         | 0.087               | 0.005              | 0.004              | 0.550 |
| mvL                       |                            |                                        | 1.50 (1.20-1.87) | $4 \times 10^{-4}$       | 0.027               | 0.022              | 0.625              |       |
| mvL(BLD-X)                | 1.52 (1.22-1.88)           | $2 \times 10^{-4}$                     | 0.027            | 0.023                    | 0.621               |                    |                    |       |
| BD                        | BD<br>(with psychosis)     | Cases = 93<br>NAARs = 442              | C+T              | 1.41 (1.11-1.79)         | 0.005               | 0.017              | 0.014              | 0.602 |
|                           |                            |                                        | Thresholding     | 1.59 (1.25-2.03)         | $2 \times 10^{-4}$  | 0.035              | 0.027              | 0.622 |
|                           |                            |                                        | Lassosum         | 1.03 (0.81-1.30)         | 0.815               | $1 \times 10^{-4}$ | $1 \times 10^{-4}$ | 0.522 |
|                           |                            |                                        | LDpred2-auto     | 2.03 (1.60-2.57)         | $6 \times 10^{-9}$  | 0.085              | 0.063              | 0.688 |
|                           |                            |                                        | LDpred2-grid-sp  | 2.00 (1.57-2.54)         | $2 \times 10^{-8}$  | 0.079              | 0.058              | 0.681 |
|                           | BD<br>(without psychosis)  | Cases = 112<br>NAARs = 442             | PANPRS           | 1.00 (0.80-1.25)         | 0.986               | 0.000              | 0.000              | 0.496 |
|                           |                            |                                        | mvL              | 2.09 (1.65-2.66)         | $2 \times 10^{-9}$  | 0.090              | 0.067              | 0.699 |
|                           |                            |                                        | mvL(BLD-X)       | 2.23 (1.75-2.85)         | $8 \times 10^{-11}$ | 0.108              | 0.079              | 0.718 |
|                           |                            |                                        | C+T              | 1.57 (1.27-1.93)         | $2 \times 10^{-5}$  | 0.028              | 0.025              | 0.623 |
|                           |                            |                                        | Thresholding     | 1.60 (1.29-1.98)         | $2 \times 10^{-5}$  | 0.031              | 0.027              | 0.625 |
| BD<br>(without psychosis) | Cases = 112<br>NAARs = 442 | Lassosum                               | 1.40 (1.14-1.74) | 0.002                    | 0.015               | 0.014              | 0.597              |       |
|                           |                            | LDpred2-auto                           | 1.90 (1.52-2.38) | $2 \times 10^{-8}$       | 0.064               | 0.050              | 0.676              |       |
|                           |                            | LDpred2-grid-sp                        | 2.04 (1.62-2.55) | $7 \times 10^{-10}$      | 0.071               | 0.057              | 0.690              |       |
|                           |                            | PANPRS                                 | 0.97 (0.78-1.20) | 0.764                    | $2 \times 10^{-4}$  | $2 \times 10^{-4}$ | 0.487              |       |
|                           |                            | mvL                                    | 2.03 (1.63-2.53) | $2 \times 10^{-10}$      | 0.075               | 0.060              | 0.691              |       |
| mvL(BLD-X)                | 2.13 (1.71-2.66)           | $2 \times 10^{-11}$                    | 0.085            | 0.067                    | 0.709               |                    |                    |       |



*a*: SS: summary statistics

*b*: Odds ratio of trait and 95% confidence interval for an increase of 1 standard deviation in PRS

*c*: Squared Pearson correlation ( $R^2$ ) and coefficient of determination on the liability scale ( $R^2_{\text{liab.}}$ )<sup>1</sup> for PRS and diagnosis status. Population prevalence was set to 0.9% for BD with psychosis and 1.1% for BD without psychosis (proportional to sample frequencies)

*d*: Non-affected adult relatives

*e*: Clumping (window size=250 kb,  $r^2$  and  $p$  selected by validation) and thresholding ( $p$  selected by validation)

*f*: Multivariate Lasso

*g*: BLD-X: Baseline linkage disequilibrium model-cross trait

*h*: SZ: schizophrenia, BD: bipolar disorder

## References

- [1] Lee, S. H., Goddard, M. E., Wray, N. R., and Visscher, P. M. (2012). A better coefficient of determination for genetic profile analysis. *Genet Epidemiol* 36, 214–24.
- [2] Perälä, J., Suvisaari, J., Saarni, S. I., Kuoppasalmi, K., Isometsä, E., Pirkola, S., Partonen, T., Tuulio-Henriksson, A., Hintikka, J., Kieseppä, T. et al. (2007). Lifetime prevalence of psychotic and bipolar I disorders in a general population. *Arch Gen Psychiatry* 64, 19–28.
